# Supplementary material
Source: PubMed Central journal article supplement (PMC3071246)
Supplement: NIHMS269365-supplement-Supp_Info_1.pdf [file NIHMS269365-supplement-Supp_Info_1.pdf]

## Cold Denaturation of the Hammerhead Ribozyme

Peter J. Mikulecky and Andrew L. Feig\*

*Department of Chemistry, Indiana University, 800 East Kirkwood Avenue, Bloomington, Indiana 47405*

### Supporting Information.

Optical thermal melt data were fit to the double-baseline equation:

$$\Delta\epsilon_R = (m_i T + b_i)(1 - \alpha) + (m_f T + b_f)\alpha$$

where  $\Delta\epsilon_R = \theta / (32,980 \cdot [\text{HH16}] \cdot 0.1 \text{ cm} \cdot 55 \text{ nucleotides})$ ,  $m$  and  $b$  are the initial and final baseline slopes and intercepts, respectively, and  $\alpha$  is the fraction of folded HH16.

$\alpha$  was derived as follows, where  $T_m$  is the melting temperature,  $C_T$  is the total strand concentration of HH16,  $K$  is the equilibrium constant for the unfolding reaction, and  $R$  is the gas constant. Boxed equations are from Turner, D. In *Nucleic Acids: Structures, Properties and Functions*; Bloomfield, V. A.; Crothers, D. M.; Tinoco, I., Jr., Eds.; University Science Books: Sausalito, CA, 2000; pp. 272-273.

$$\begin{aligned}\Delta G^\circ &= -RT \ln K = \Delta H^\circ - T\Delta S^\circ \\ -RT \ln K &= \Delta H^\circ - T\Delta H^\circ \left( \frac{\Delta S^\circ}{\Delta H^\circ} \right)\end{aligned}$$

and

$$\boxed{\frac{1}{T_m} = \frac{R \ln\left(\frac{C_T}{4}\right)}{\Delta H^\circ} + \frac{\Delta S^\circ}{\Delta H^\circ}}$$

therefore

$$-RT \ln K = \Delta H^\circ - T\Delta H^\circ \left( \frac{1}{T_m} - \frac{R}{\Delta H^\circ} \left( \ln\left(\frac{C_T}{4}\right) \right) \right)$$

$$-RT \ln K = \Delta H^\circ - \frac{T\Delta H^\circ}{T_m} + RT \ln\left(\frac{C_T}{4}\right)$$

$$\ln K = \frac{\Delta H^\circ}{R} \left( \frac{1}{T_m} \right) - \frac{\Delta H^\circ}{RT} - \ln\left(\frac{C_T}{4}\right)$$

$$\ln K + \ln\left(\frac{C_T}{4}\right) = \frac{\Delta H^\circ}{R} \left( \frac{1}{T_m} - \frac{1}{T} \right)$$

$$\ln\left(K \cdot \frac{C_T}{4}\right) = \frac{\Delta H^\circ}{R} \left( \frac{1}{T_m} - \frac{1}{T} \right)$$

$$K \cdot \frac{C_T}{4} = \exp\left(\frac{\Delta H^\circ}{R} \left( \frac{1}{T_m} - \frac{1}{T} \right)\right)$$

and

$$\boxed{K = \frac{2\alpha}{(1-\alpha)^2 \cdot C_T}}$$

therefore

$$\alpha = \left( \frac{1+4K \pm \sqrt{8K+1}}{4K} \right)$$
